# Supplementary material for: Hsa_Circ_0007841 Enhances Multiple Myeloma Chemotherapy Resistance Through Upregulating ABCG2
Source: PubMed Central journal article supplement — Technol Cancer Res Treat. 2020 Jun 19;19:1533033820928371. doi: 10.1177/1533033820928371 (PMC7307286; doi:10.1177/1533033820928371), 2020-06-19
Supplement: supplemental_results.pdf [file supplemental_results.pdf]

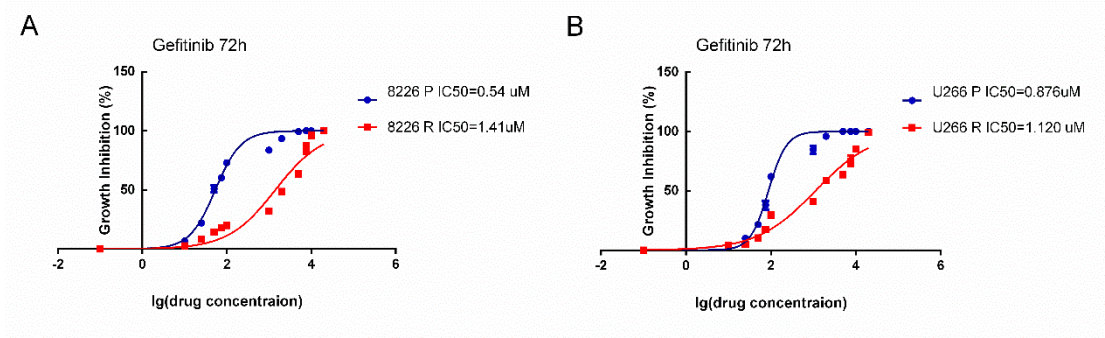

Supplemental figure 1.

A. IC50s of gefitinib in 8226P and 8226R cells at 72 hours. B. IC50s of gefitinib in U266P and U266R cells at 72 hours.
